# Supplementary material for: Crafting “brick–mud” segregated nanocomposites: a novel approach to superior electromagnetic interference shielding, electrical insulation, and thermal conductivity in biopolymers
Source: Royal Society of Chemistry journal article supplement (doi:10.1039/d4nr03175j), 2024-01-01
Supplement: d4nr03175j1.pdf [file d4nr03175j1.pdf]

## Supporting Information

*Crafting "Brick-Mud" Segregated Nanocomposites: A Novel Approach to Superior Electromagnetic Interference Shielding, Electrical Insulation, and Thermal Conductivity in Biopolymers*

*Tong Liu<sup>a‡</sup>, Huiyao Feng<sup>a‡</sup>, Linbing Deng<sup>a‡</sup>, Chenhong Jin<sup>a</sup>, Henri Vahabi<sup>b</sup>, Mohammad Reza Saeb<sup>c</sup>, Tairong Kuang<sup>a\*</sup>*

<sup>a</sup> Functional Polymers & Advanced Materials (FPAM) Lab, College of Materials Science and Engineering, Zhejiang University of Technology, Hangzhou 310014, P. R. China

<sup>b</sup> Université de Lorraine, CentraleSupélec, LMOPS, Metz, France.

<sup>c</sup> Department of Pharmaceutical Chemistry, Medical University of Gdańsk, J. Hallera 107, 80-416 Gdańsk, Poland

<sup>‡</sup>These authors contributed equal to this work.

<sup>\*</sup>*Corresponding author:* T. R. Kuang (E-mail: [kuangtr@zjut.edu.cn](mailto:kuangtr@zjut.edu.cn)).

## **Experimental section**

### ***Differential scanning calorimetry (DSC) analysis.***

The melting points of PCL/BN and PLA/CNTs composites were characterized by DSC analysis. DSC analyses were conducted with a Q2000TA instrument (Delaware, USA) in a nitrogen atmosphere at a flow rate of 50 mL/min. The analysis of PLA/CNTs composites was carried out in three steps: initial heating from 25 °C to 200 °C, cooling back to 25 °C after a 2 min hold, followed by a second heating from 25 °C to 200 °C. A sample size of 5 mg was used, with both heating and cooling rates set at 10 °C/min. The analysis of PCL/BN composites is the same as above, but the maximum temperature is set to 100°C.

### ***Morphological characterization.***

The morphology of the fracture surface for s-xByC and r-xByC composites was observed using a Digital Microscope (DM, DM4, China). The fracture morphology of PLA/CNTs composites was observed using a scanning electron microscope (SEM, Regulus 8100, HITACHI). Before SEM analysis, the fracture surfaces were gold-plated for 90 s in vacuum conditions. The operating voltage for SEM was set at 10 kV. The brittle fracture of the sample was obtained by cooling the sample with liquid nitrogen for 2 h and then rapidly cracking it with force.

### ***Rheological properties measurement.***

Rheological properties of the PLA/CNTs composites, with dimensions of 25 mm in diameter and 1 mm in thickness, were assessed using a MCR302 rheometer (Anton Paar, Austria). Analysis was conducted at 180 °C, employing a frequency sweep from 100 to 0.1 rad/s at a constant amplitude of 1 % to guarantee the identification of the linear viscoelastic (LVE) region.

### ***Electrical conductivity measurements.***

Electrical conductivity measurements for PLA/CNTs composites were conducted in dry air at ambient temperature using a four-point probe resistivity system (RTS-9, Guangzhou Four Probes Technology Company Ltd., China) and a high-resistance meter (ZC36, Shanghai Anbiao Electronic Co., Ltd., China).

### ***Electromagnetic interference (EMI) shielding performance measurements.***

The EMI performance of the 3mm PLA/CNTs composites was evaluated within the X-band frequency range (8.2-12.4 GHz) via a vector network analyzer (Ceyear 3672C-S, Ceyear Technologies Co., Ltd., China). The EMI shielding performance of the material is quantified by the shielding efficiency (SE), which consists of absorption ( $SE_A$ ), reflection ( $SE_R$ ), and multiple internal reflections ( $SE_M$ ). When the total SE ( $SE_T$ ) exceeds 15 dB, the effect of  $SE_M$  becomes negligible. The relevant calculation equations are provided in formulas (1)-(6)[1].

$$T = |S_{12}|^2 = |S_{21}|^2 \#(1)$$

$$R = |S_{11}|^2 = |S_{22}|^2 \#(2)$$

$$A = 1 - T - R \#(3)$$

$$SE_A = -10 \log\left(\frac{T}{1-R}\right) \#(4)$$

$$SE_A = -10 \log(1-R) \#(5)$$

$$SE_T = SE_R + SE_A \#(6)$$

Here, T, R, and A represent the transmission, reflection, and absorption coefficients, respectively. The S-parameters ( $S_{11}$ ,  $S_{12}$ ,  $S_{22}$ , and  $S_{21}$ ) were measured using a vector network analyzer.

## Supplementary Figures and Tables

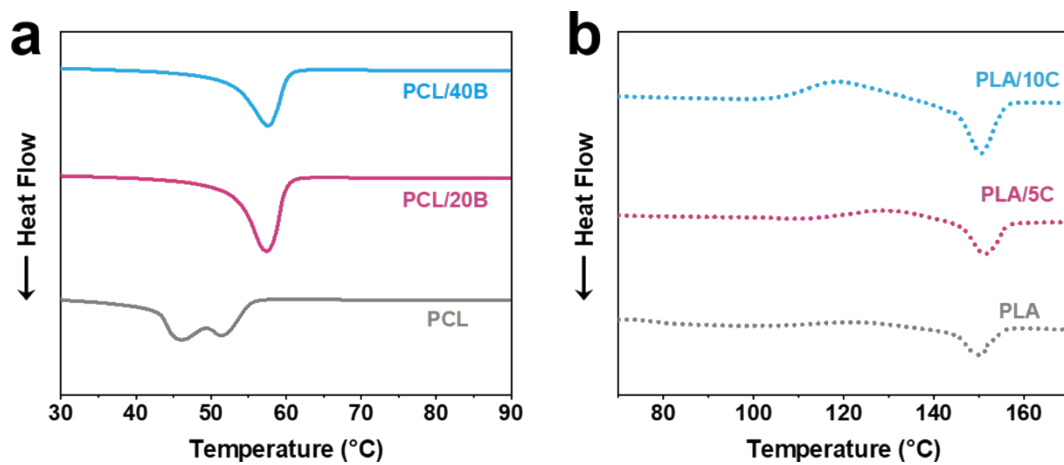

**Fig. S1.** The second-heating curves of (a) PCL, PCL/20B and PCL/40B and (b) PLA, PLA/5C and PLA/10C.

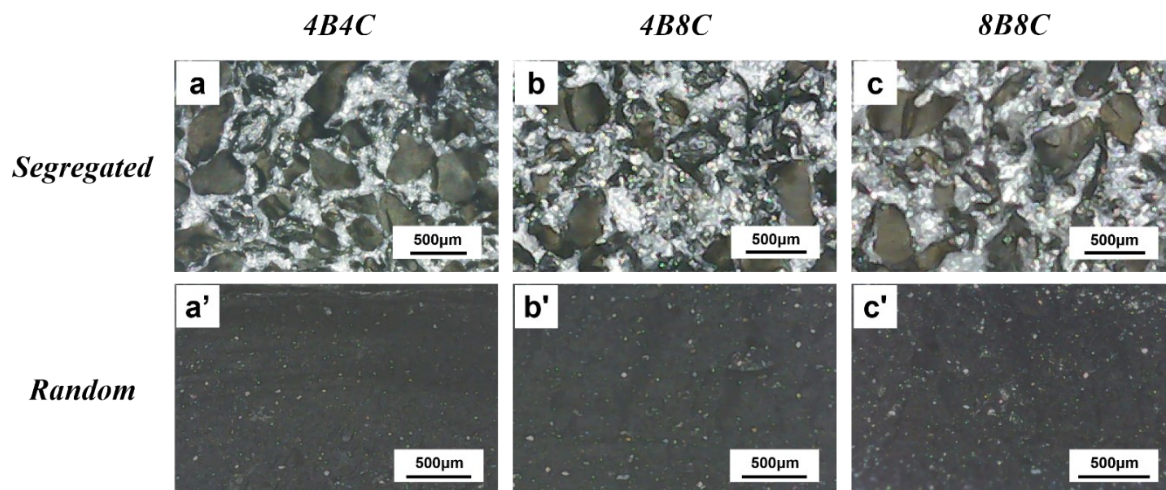

**Fig. S2.** Digital Microscope images of cryo-fractured surfaces: (a) s-4B4C, (b) s-4B8C, (c) s-8B8C, (a') r-4B4C, (b') r-4B8C, (c') r-8B8C.

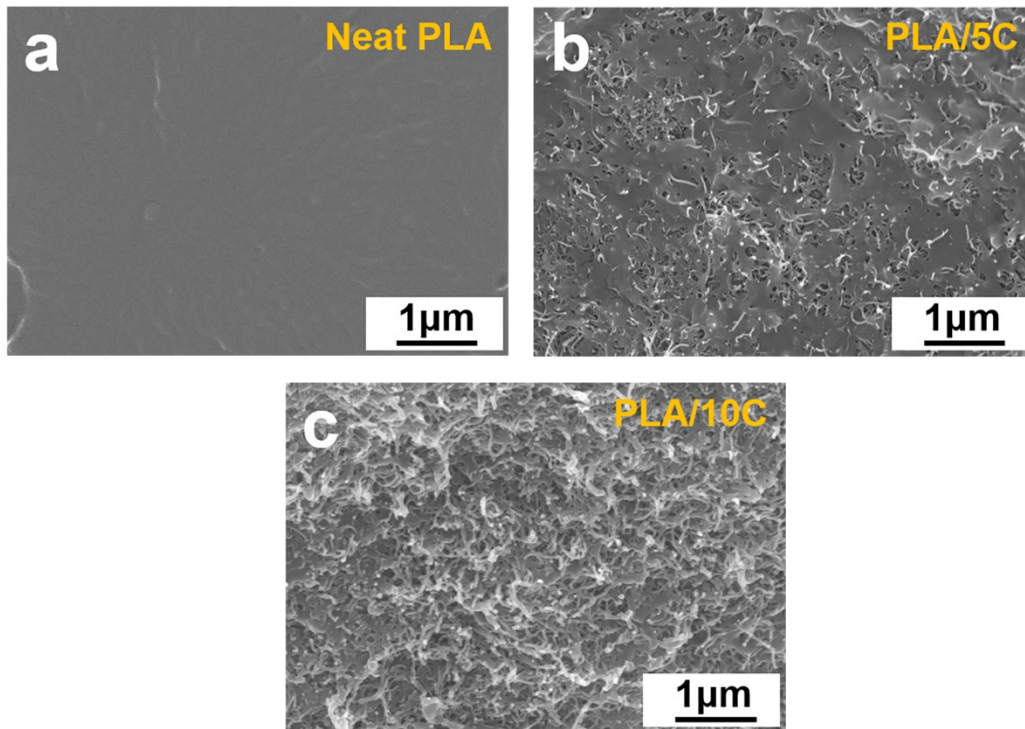

**Fig. S3.** SEM images of cryo-fractured surfaces: (a)PLA, (b) PLA/5C, (c) PLA/10C.

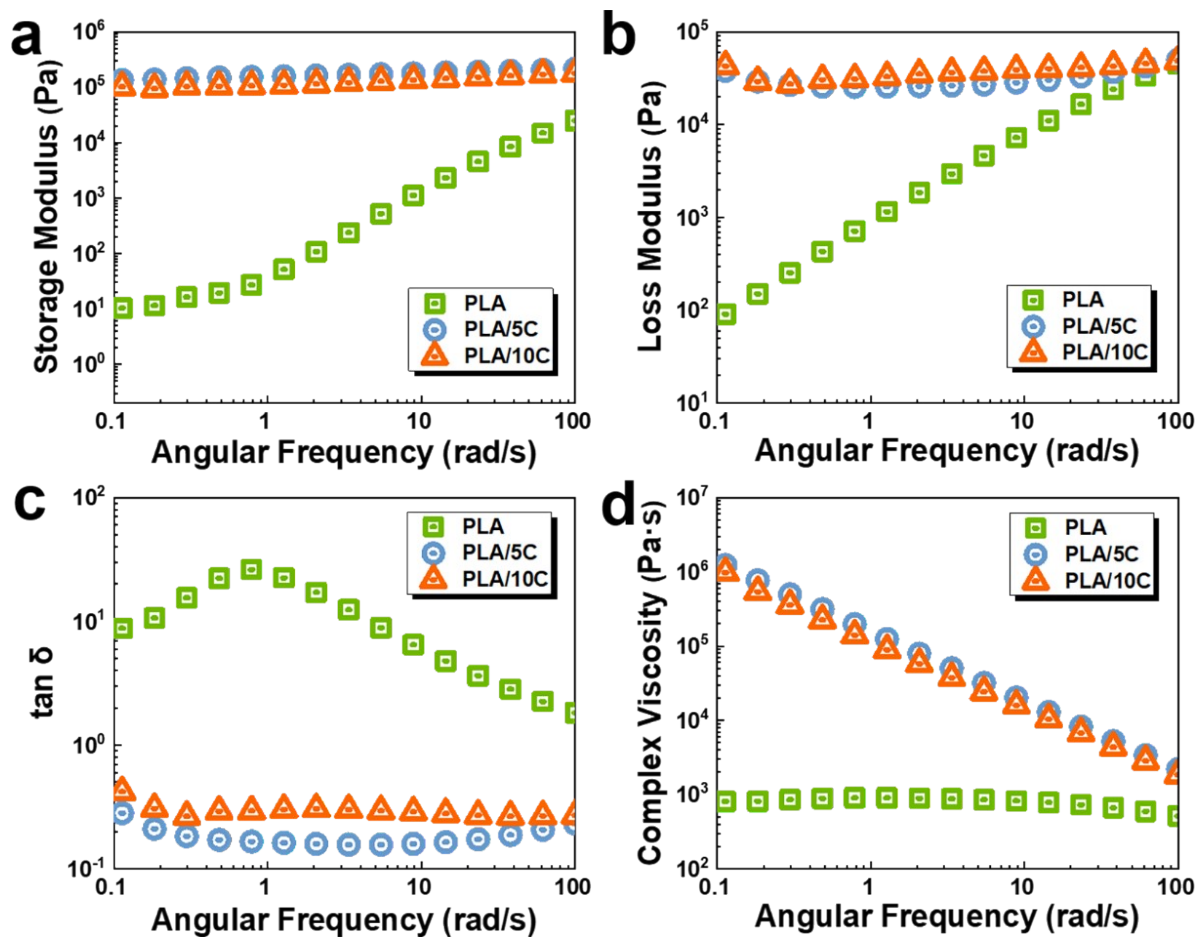

**Fig. S4.** Rheological properties of PLA and PLA/CNTs composites: (a) storage modulus, (b) loss modulus, (c)  $\tan \delta$ , (d) complex viscosity.

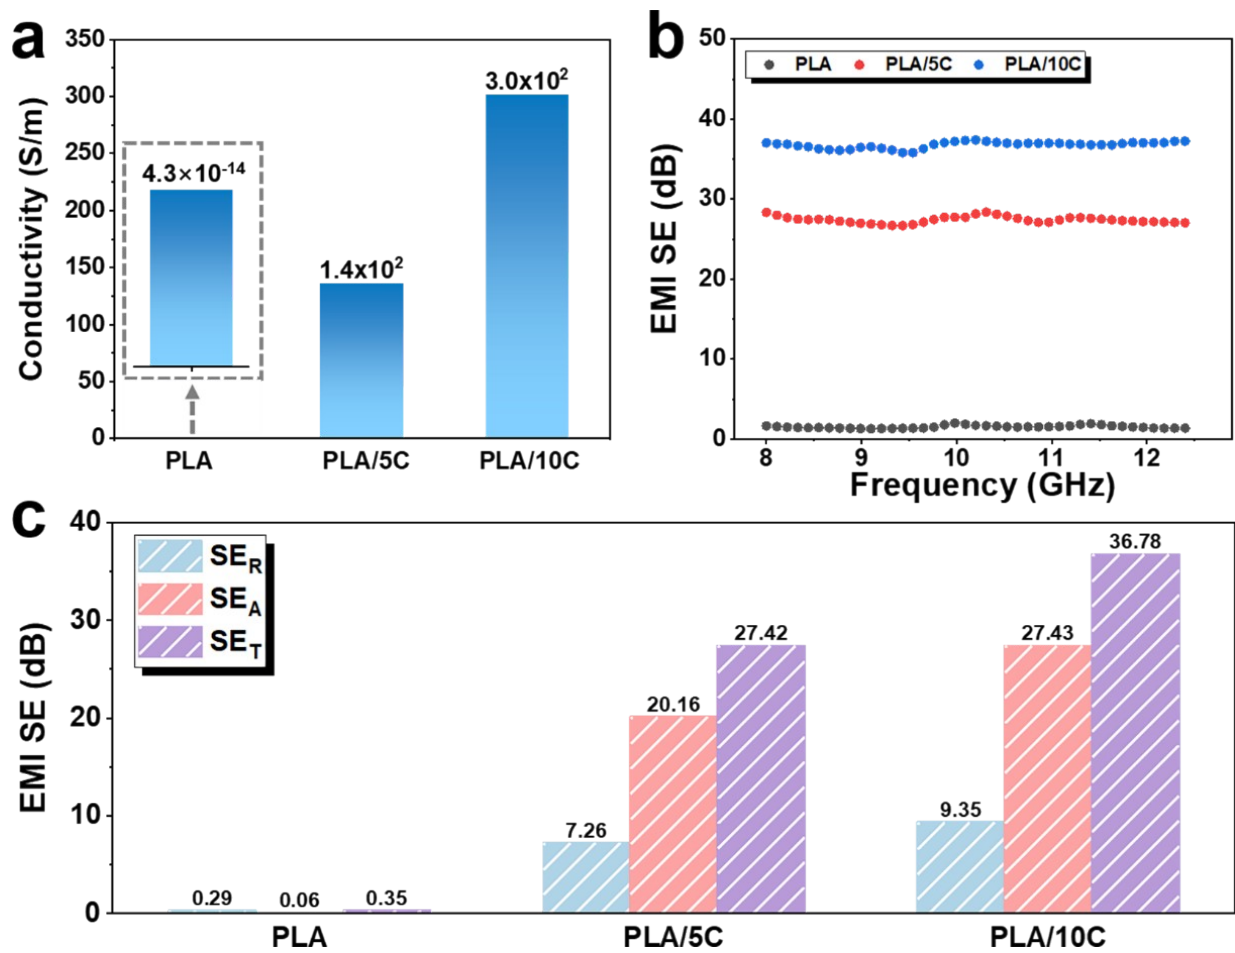

**Fig. S5.** (a) Electrical conductivity and (b, c) EMI shielding performance of PLA and PLA/CNTs composites.



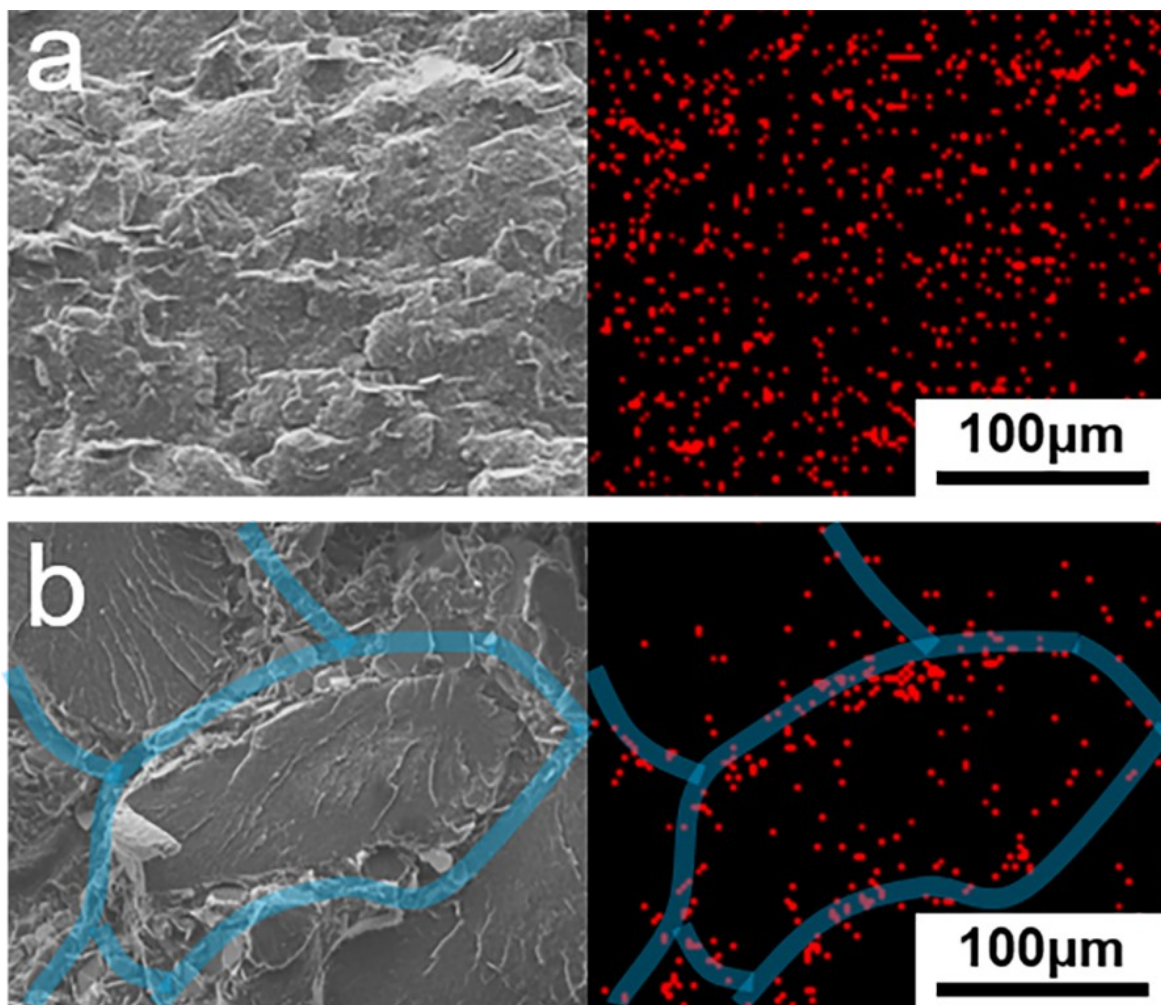

**Fig. S6.** SEM and EDS images of (a) r-8B8C and (b) s-8B8C.

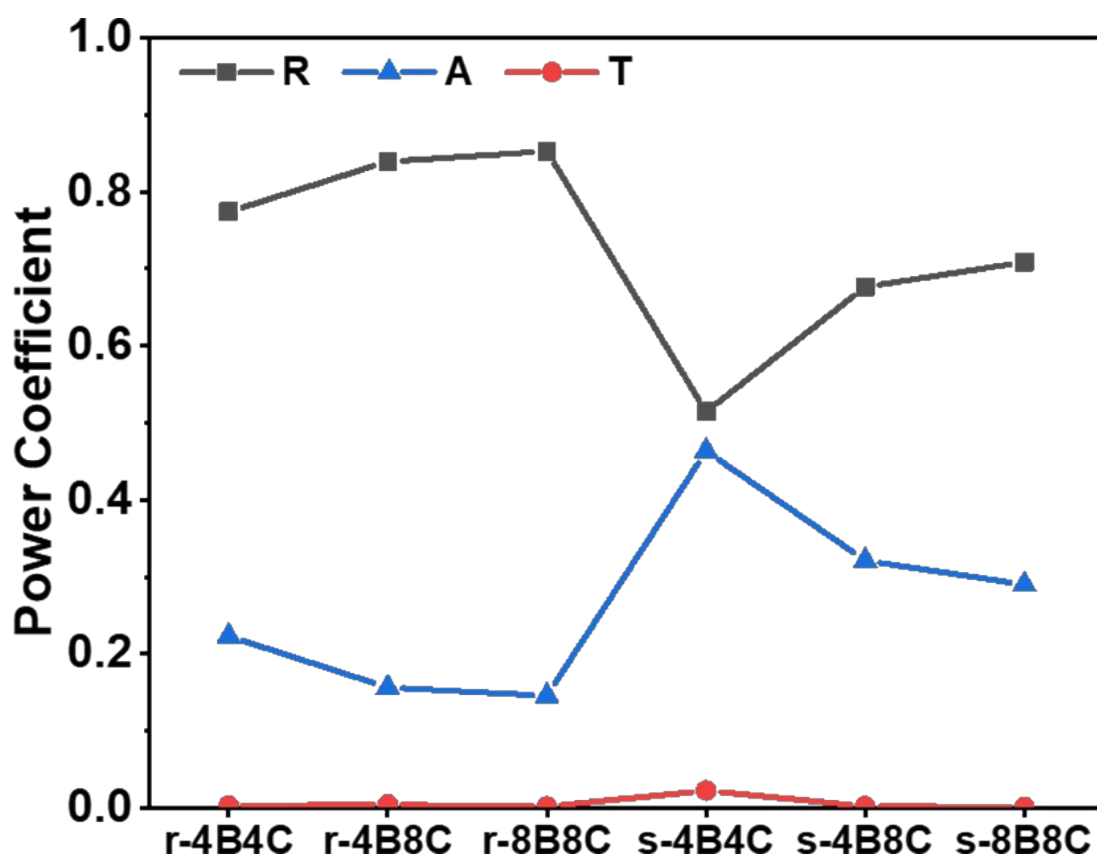

Fig. S7. Reflection (R), absorption (A), and transmission (T) coefficients of various materials.

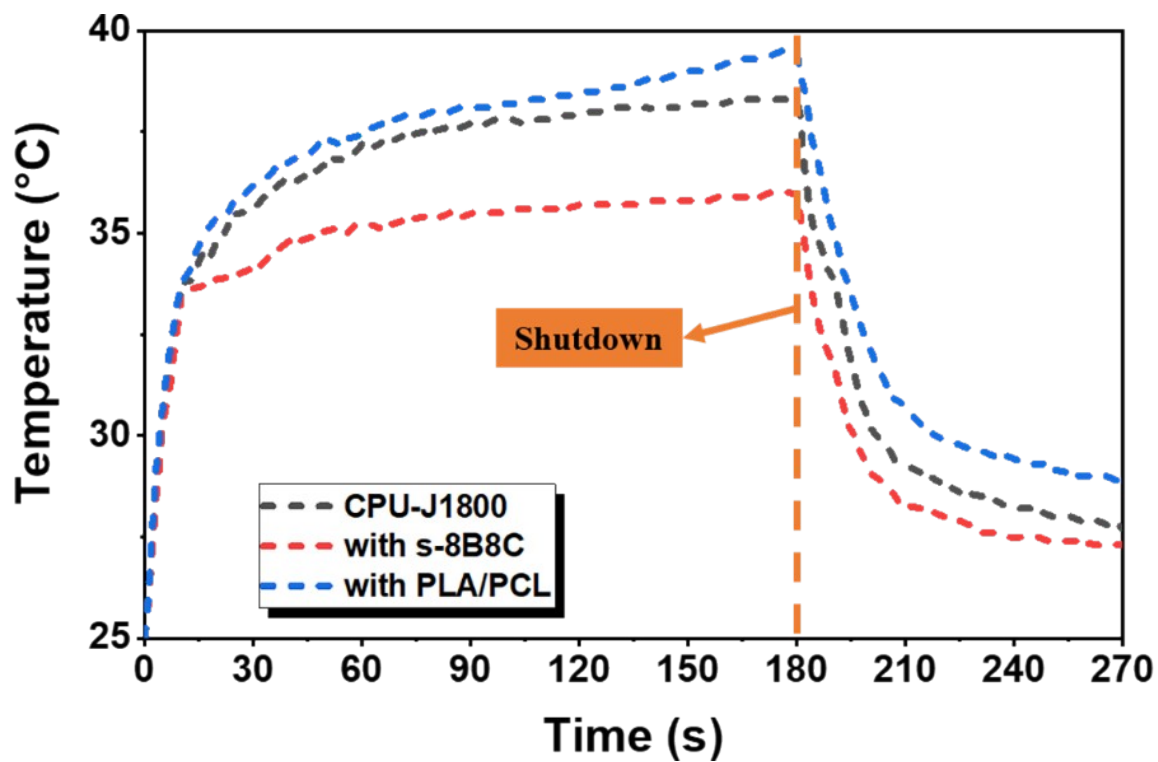

Fig. S8. Thermal performance test of the CPU-J1800.

**Table S1.** Electrical conductivity and volume resistivity of various samples.

| <b>Sample</b>                                                       | <b>PLA/PCL</b>        | <b>r-4B4C</b> | <b>r-4B8C</b> | <b>r-8B8C</b> | <b>s-4B4C</b>         | <b>s-4B8C</b>         | <b>s-8B8C</b>         |
|---------------------------------------------------------------------|-----------------------|---------------|---------------|---------------|-----------------------|-----------------------|-----------------------|
| <b>Electrical conductivity<br/>(S/m)</b>                            | $4.3 \times 10^{-14}$ | 41.7          | 116.3         | 128.2         | $3.7 \times 10^{-12}$ | $2.6 \times 10^{-11}$ | $1.4 \times 10^{-10}$ |
| <b>Volume resistivity<br/>(<math>\Omega \cdot \text{cm}</math>)</b> | $2.3 \times 10^{15}$  | 2.4           | 0.9           | 0.8           | $2.7 \times 10^{13}$  | $3.9 \times 10^{12}$  | $7.2 \times 10^{11}$  |

**Table S2.** Thermal conductivity (TC) of various samples.

| <b>Sample</b>    | <b>PLA/PCL</b> | <b>r-4B4C</b> | <b>r-4B8C</b> | <b>r-8B8C</b> | <b>s-4B4C</b> | <b>s-4B8C</b> | <b>s-8B8C</b> |
|------------------|----------------|---------------|---------------|---------------|---------------|---------------|---------------|
| <b>TC(W/m·K)</b> | 0.15           | 0.31          | 0.37          | 0.42          | 0.29          | 0.39          | 0.60          |

## References

- [1] Wang J, Song T, Ming W, Yele M, Chen L, Zhang H, et al. High MXene loading, nacre-inspired MXene/ANF electromagnetic interference shielding composite films with ultralong strain-to-failure and excellent Joule heating performance [J]. *Nano Research*. 2023;17(3):2061-2069.
